# Supplementary material
Source: publisher figshare collection journal article supplement (https://frontiersin.figshare.com/ndownloader/files/13000433)
Supplement: Supplementary file [file 13000433]

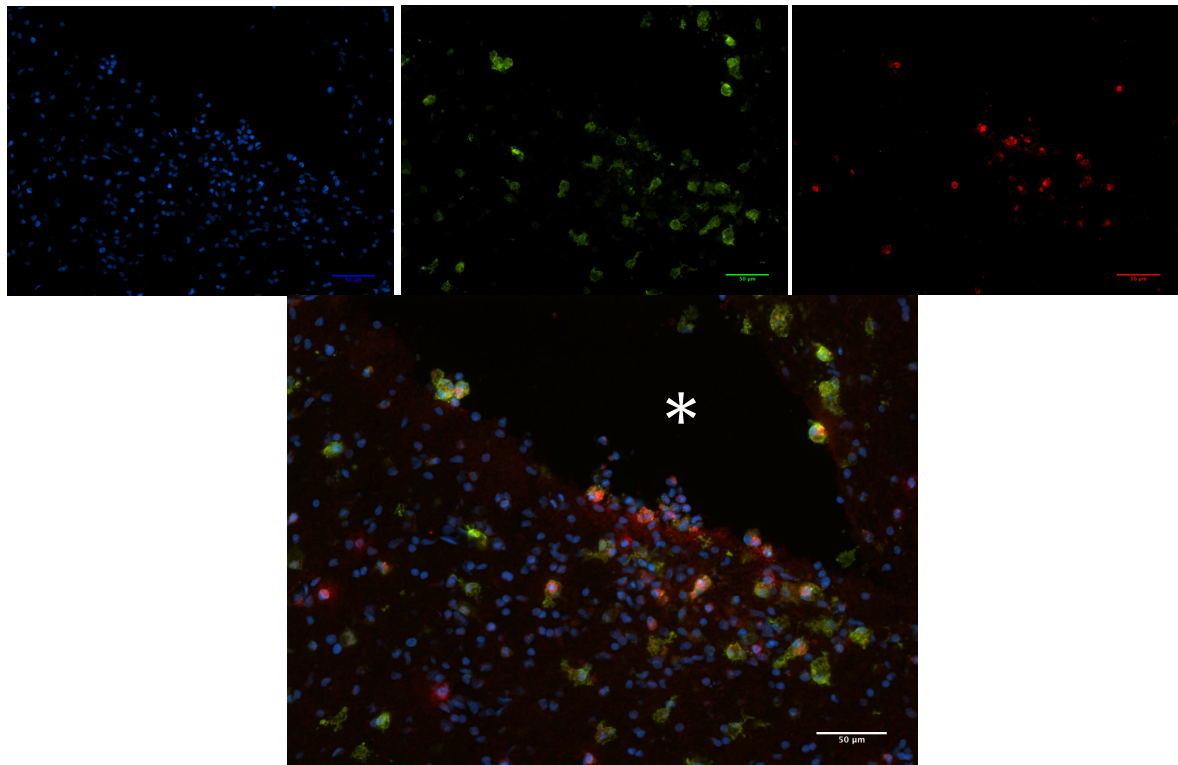

**Supplemental Figure S5:** Intra-cerebral Ibotenate injection increases Iba1 expression and induces reactive microglial activation at the peri-lesion site. Representative images of Iba1 staining (green) and CD73 (red) in peri-lesional white matter. Scale bars: 50µm. \* white matter lesion site.
